# Supplementary material
Source: publisher figshare collection journal article supplement (https://tandf.figshare.com/ndownloader/files/17290259)
Supplement: Supplementary file 1 [file 17290259]

# Gre-family factors modulate DNA damage sensing by *Deinococcus radiodurans* RNA polymerase

Aleksei Agapov, Daria Esyunina, Andrey Kulbachinskiy

## Supplementary Information

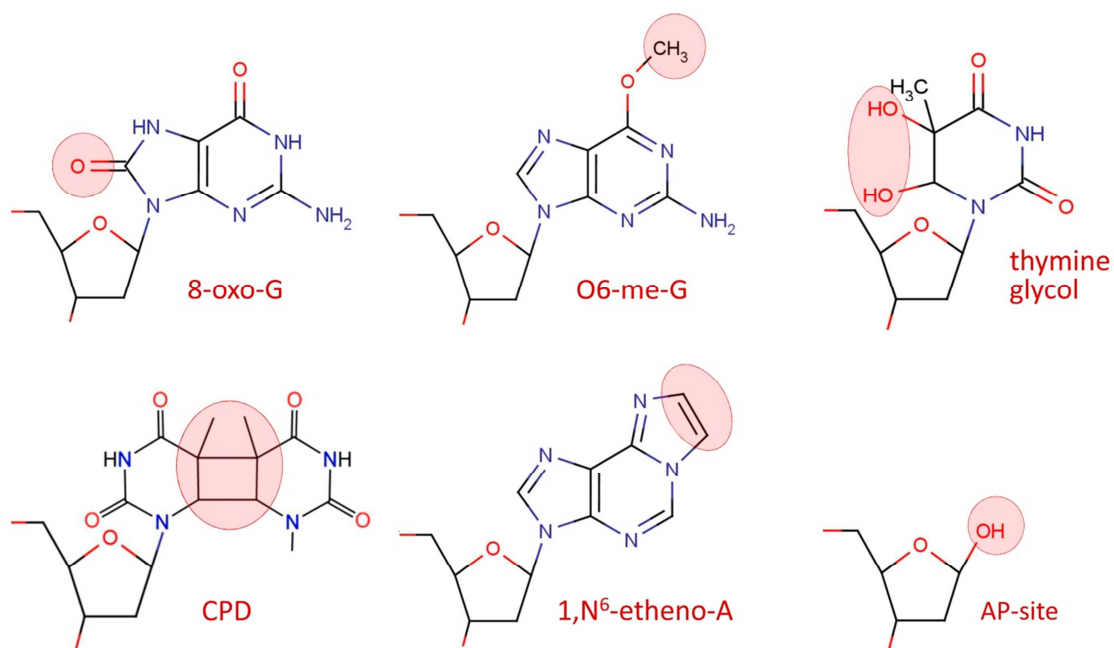

**Figure S1. Analyzed DNA lesions.** The modified nucleotide positions are shown with pink ovals.

8oxoG, O6meG
ATAATGAGCGGAT

5' - CCAAGTCTAACCTATAGAGGATACTTAGTGCT
 CGCCGGTTCACACAGGAAACAGCTGA

|||||
 |||||

3' - GGTTCAGATTGGATATCTCCTATGAATCACGATATTACTCGCCTAG
 CGGCCAAGTGTGTCCTTTGTCGACT

|||||

5' -AUCACGAUAAAUAGAGCGG

  

TG
ATAATGAGCGGAT

5' - CCAAGTCTAACCTATAGAGGATACTTAGTGCT
 AGCCGGTTCACACAGGAAACAGCTGA

|||||
 |||||

3' - GGTTCAGATTGGATATCTCCTATGAATCACGATATTACTCGCCTAT
 CGGCCAAGTGTGTCCTTTGTCGACT

|||||

5' -AUCACGAUAAAUAGAGCGG

  

CPD
ATAATGAGCGGATC

5' -CCAAGTCTAACCTATAGGATACTTAGTGCT
 AAGTGTTACACAGGAGAATTCACAG

|||||
 |||||

3' -GGTTCAGATTGGATATCCTATGAATCACGATATTACTCGCCTAG
 TTCACAAGTGTGTCCTCTTAAGTGTC

|||||

5' -AUCACGAUAAAUAGAGCGGA

|                                             |                        |                                             |                         |
|---------------------------------------------|------------------------|---------------------------------------------|-------------------------|
| <u>8oxoG</u>                                | 5' -TAAGTACTTGAGCT     | <u>CPD</u>                                  | 5' -AAGTTACTTTGAGCTGCCC |
|                                             |                        |                                             |                         |
| 3' -TTACTGGTCCG <u>G</u> ATTCATGAACTCGA     |                        | 3' -TTACTGGTCCGGT <u>T</u> CAATGAACTCGACGGG |                         |
|                                             |                        |                                             |                         |
| 5' -UUCGACCAGGC                             |                        | 5' -UUCGACCAGGCC                            |                         |
|                                             |                        |                                             |                         |
| <u>O6meG</u>                                | 5' -CGTATACTTGAGCTGCCC | <u>εA</u>                                   | 5' -TGAATACTTGAGCTGCCC  |
|                                             |                        |                                             |                         |
| 3' -TTACTGGTCCGT <u>G</u> CATATGAACTCGACGGG |                        | 3' -TTACTGGTCCGG <u>A</u> CTTATGAACTCGACGGG |                         |
|                                             |                        |                                             |                         |
| 5' -UUCGACCAGGCCA                           |                        | 5' -UUCGACCAGGCC                            |                         |
|                                             |                        |                                             |                         |
| <u>AP</u>                                   | 5' -AGTATACTTGAGCTGCCC | <u>TG</u>                                   | 5' -AGTATACTTGAGCTGCCC  |
|                                             |                        |                                             |                         |
| 3' -TTACTGGTCCGG <u>_</u> CATATGAACTCGACGGG |                        | 3' -TTACTGGTCCGGT <u>C</u> ATATGAACTCGACGGG |                         |
|                                             |                        |                                             |                         |
| 5' -UUCGACCAGGCC                            |                        | 5' -UUCGACCAGGCC                            |                         |

**Figure S2. Structure of analyzed TECs.** (A) Complete TECs containing 8oxoG, O6meG, TG and CPD. (B) Minimal TECs containing 8oxoG, O6meG, the AP-site, TG, CPD and  $\epsilon$ A. RNA is shown in red. Positions of modified nucleotides in the template DNA strand are shown in underlined italics.

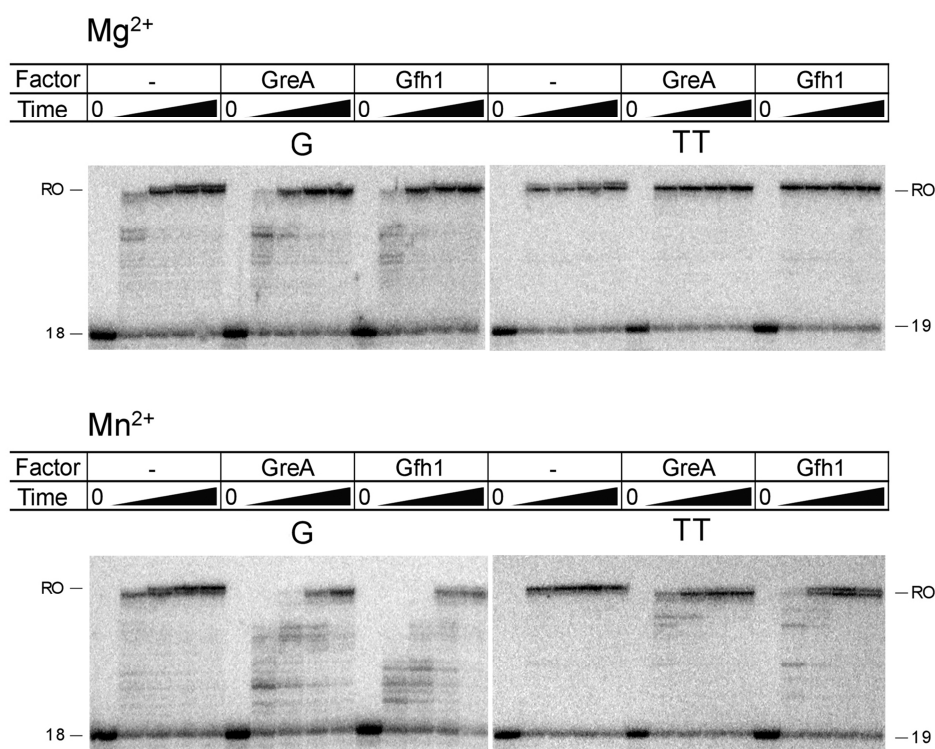

**Figure S3. RNA synthesis by *Dra* RNAP in control TECs corresponding to the 8oxoG and CPD templates in the absence or in the presence of GreA and Gfh1.** The reactions were performed for 10", 30", 1', and 20' in the presence of 10  $\mu$ M of NTPs at 30  $^{\circ}$ C for the G template, and 100  $\mu$ M of NTPs at 37  $^{\circ}$ C for the TT template, in transcription buffers containing either  $Mg^{2+}$  or  $Mn^{2+}$ . Positions of the starting RNA (18/19 nt) and full-length run-off (RO) transcripts are shown on the sides of the gels. GreA and Gfh1 were added to 5  $\mu$ M where indicated.

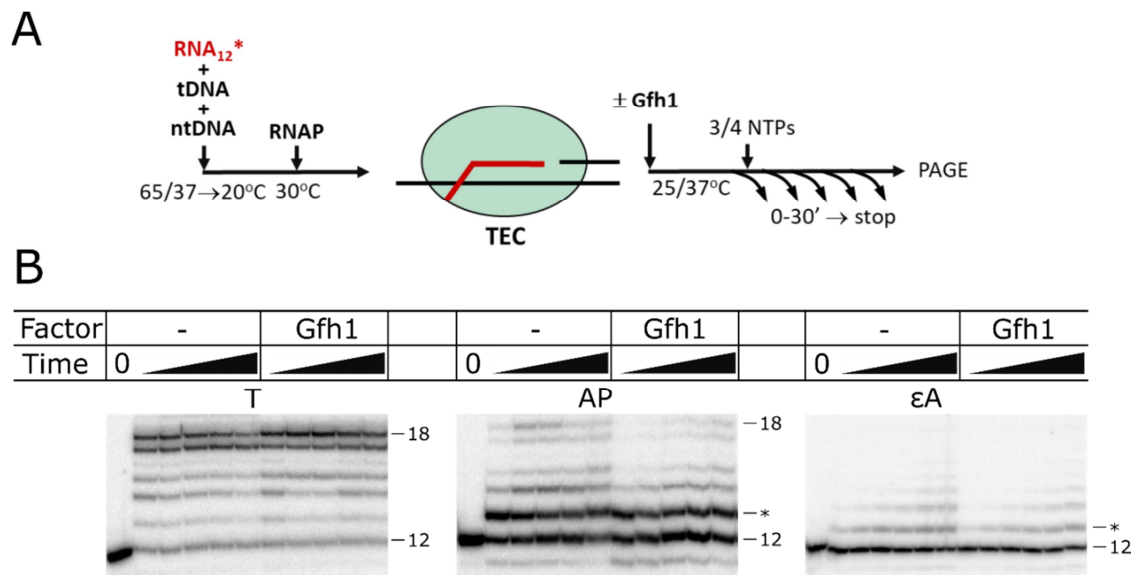

**Figure S4. Analysis of transcription in minimal TECs containing the AP-site, εA and in corresponding control TEC.** (A) Scheme of the experiment. (B) Analysis of transcription RNA synthesis. The reactions were performed for 10", 30", 1', 3', and 30' in the presence of 1 mM ATP, UTP and GTP at 25 °C for the AP-site or in the presence of 1 mM ATP, UTP, GTP and CTP at 37 °C for εA. Gfh1 was added to 5 μM where indicated. Positions of the starting RNA (12 nt), read-through transcripts (18 nt) and the sites of lesions (asterisks) are indicated. In the case of the control minimal TEC, most complexes efficiently extend RNA to the expected position (18 nt). The presence of the AP-site or εA strongly inhibits transcription.

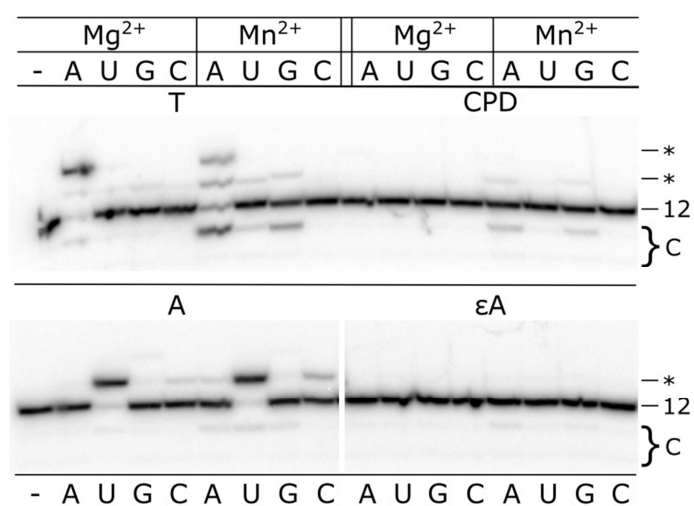

**Figure S5. Fidelity of nucleotide incorporation by *Dra* RNAP on the CPD, εA and corresponding control templates at low nucleotide concentrations.** The reactions were performed under the same conditions as in Figure 2 (at 37 °C) but at 10 μM NTPs. Positions of the starting 12 nt RNA, the sites of lesions, and the cleavage products (C) are indicated.
